# Supplementary material for: Cumulative Risk Meets Inter-Individual Variability: Probabilistic Concentration Addition of Complex Mixture Exposures in a Population-Based Human In Vitro Model
Source: MDPI journal article supplement (doi:10.3390/toxics10100549), 2022-09-20
Supplement: s1 [file s1]

# Supplementary Materials: Cumulative Risk Meets Inter-Individual Variability: Probabilistic Concentration Addition of Complex Mixture Exposures in a Population-Based Human In Vitro Model

Suji Jang, Lucie C. Ford, Ivan Rusyn and Weihsueh A. Chiu

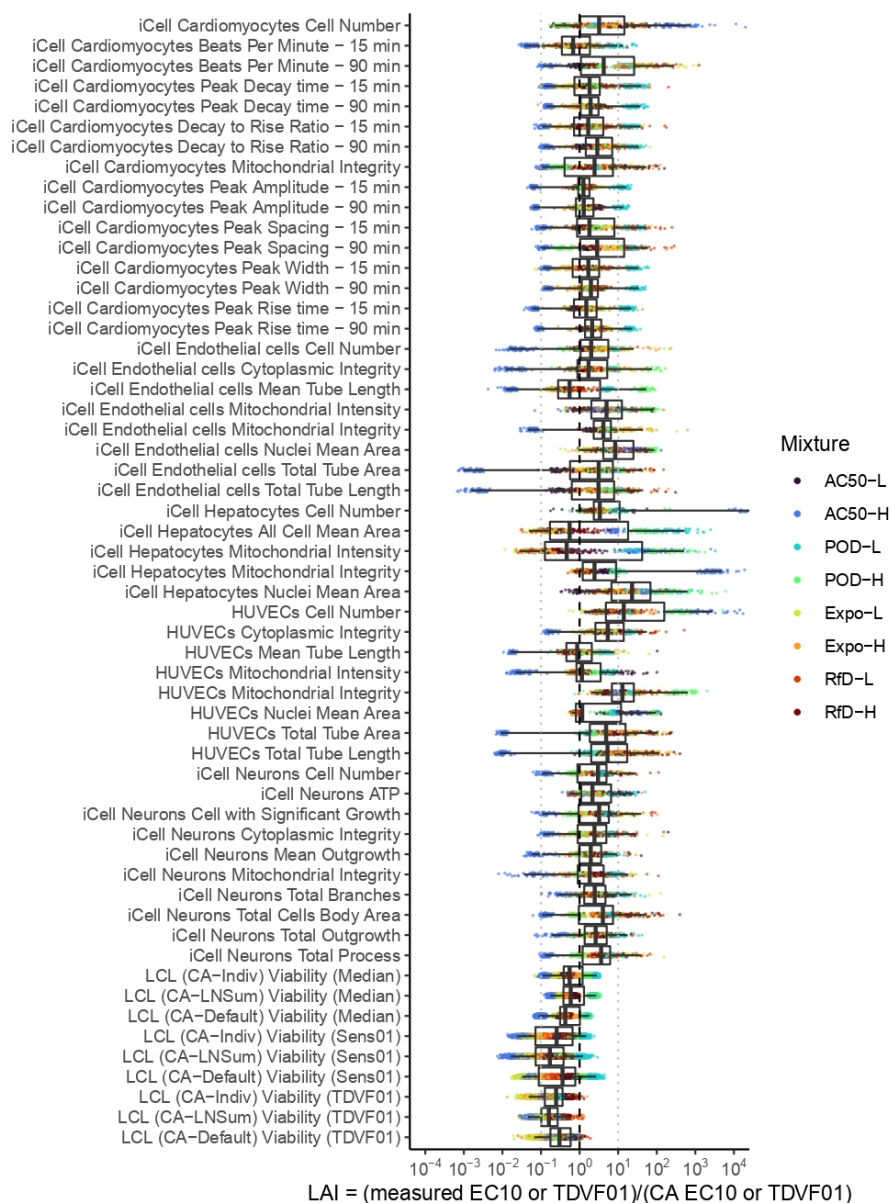

Figure S1. LAI comparisons for different CA approaches across various *in vitro* models

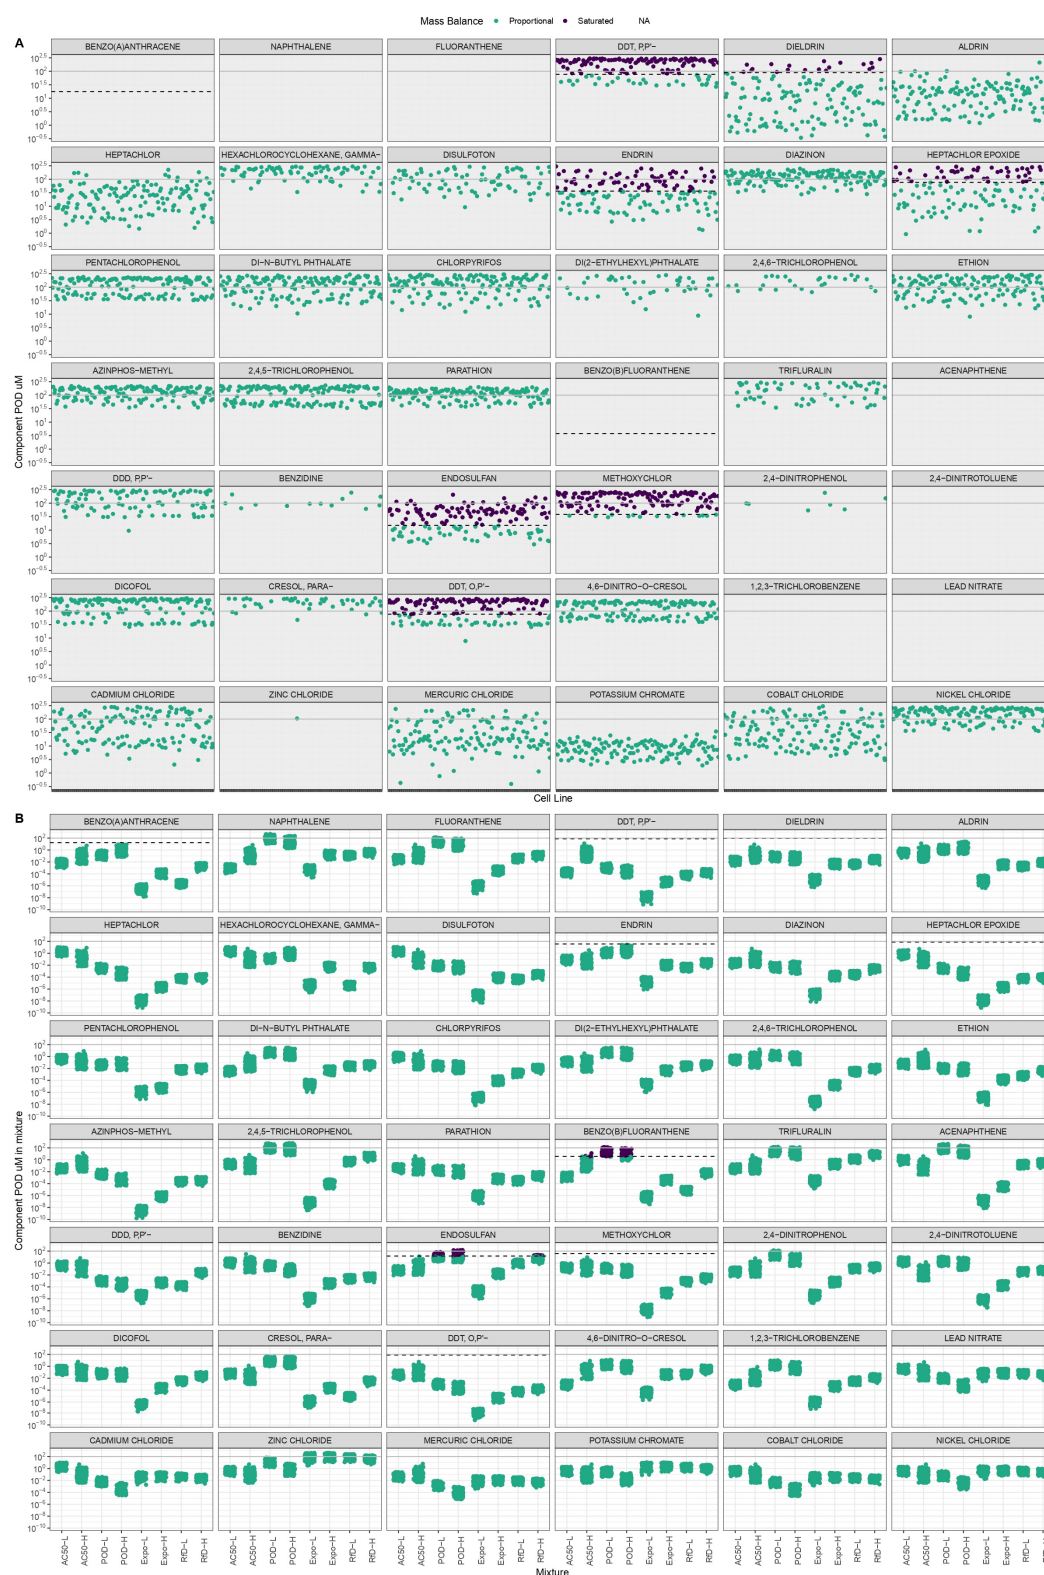

**Figure S2.** Summary of concentrations where computational modeling indicates saturation of bioavailability. For each component chemical (panels), horizontal grey line is 100  $\mu\text{M}$  (maximum concentration in single component experiments), horizontal dashed line is concentration where saturation

begins. Circles represent the POD concentrations of component chemicals in each individual experiment (A) and each mixture (B) and different colors represent proportional [light green] versus saturated [dark purple] bioavailability.

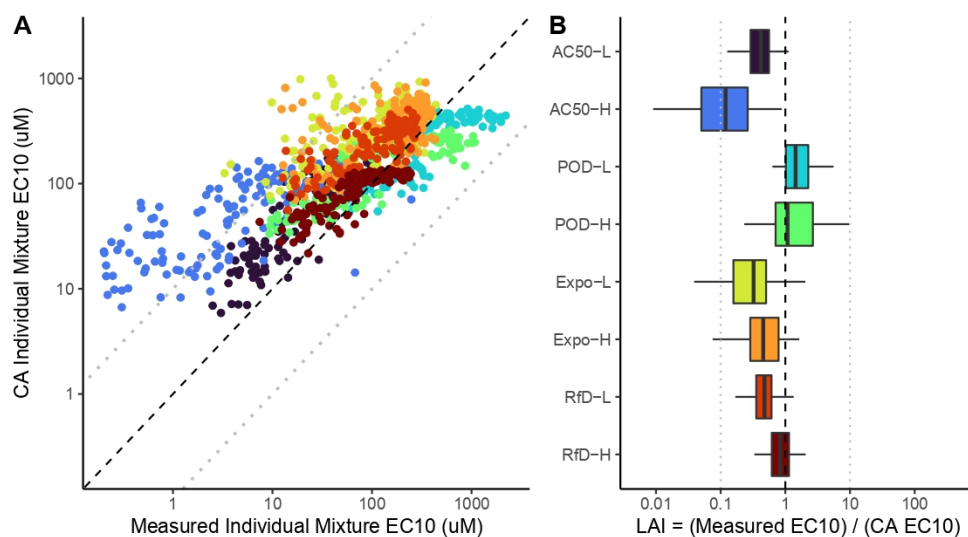

**Figure S3.** Comparison of mixture points of departure (POD = EC10) measured and predicted by concentration addition (CA) for each individual cell line (same as Figure 2), but truncating PODs at the saturating concentrations (shown in Figure S2)
